# Supplementary material
Source: PubMed Central journal article supplement (PMC6635039)
Supplement: NIHMS1019430-supplement-Supp_TableS1-4.pdf [file NIHMS1019430-supplement-Supp_TableS1-4.pdf]

**Table S1A Greening in lafl singles, Fisher's Exact Tests**

|               | WT Col |       | <i>fus3-3</i> |       | p-value  |
|---------------|--------|-------|---------------|-------|----------|
|               | Green  | White | Green         | White |          |
| Early heart   | 0      | 179   | 0             | 59    | 1        |
| Mid heart     | 34     | 119   | 0             | 55    | 0        |
| Late heart    | 135    | 69    | 0             | 72    | <0.00001 |
| Early torpedo | 100    | 0     | 8             | 62    | <0.00001 |
| Mid torpedo   | 100    | 0     | 38            | 27    | <0.00001 |
| Late torpedo  | 100    | 0     | 53            | 0     | 1        |

|               | WT Col |       | <i>lec2-1</i> |       | p-value  |
|---------------|--------|-------|---------------|-------|----------|
|               | Green  | White | Green         | White |          |
| Early heart   | 0      | 179   | 0             | 57    | 1        |
| Mid heart     | 34     | 119   | 10            | 71    | 0.079    |
| Late heart    | 135    | 69    | 34            | 47    | 0.0003   |
| Early torpedo | 100    | 0     | 48            | 15    | <0.00001 |
| Mid torpedo   | 100    | 0     | 50            | 0     | 1        |
| Late torpedo  | 100    | 0     | 50            | 0     | 1        |

|               | WT Col |       | <i>abi3-3</i> |       | p-value  |
|---------------|--------|-------|---------------|-------|----------|
|               | Green  | White | Green         | White |          |
| Early heart   | 0      | 179   | 0             | 67    | 1        |
| Mid heart     | 34     | 119   | 0             | 71    | <0.00001 |
| Late heart    | 135    | 69    | 9             | 72    | <0.00001 |
| Early torpedo | 100    | 0     | 30            | 25    | <0.00001 |
| Mid torpedo   | 100    | 0     | 62            | 7     | 0.0016   |
| Late torpedo  | 100    | 0     | 68            | 0     | 1        |

|               | WT Ws |       | <i>lec1-1</i> |       | p-value  |
|---------------|-------|-------|---------------|-------|----------|
|               | Green | White | Green         | White |          |
| Early heart   | 0     | 93    | 0             | 82    | 1        |
| Mid heart     | 11    | 83    | 0             | 66    | 0.0029   |
| Late heart    | 62    | 50    | 0             | 88    | <0.00001 |
| Early torpedo | 61    | 15    | 15            | 56    | <0.00001 |
| Mid torpedo   | 79    | 0     | 56            | 37    | <0.00001 |
| Late torpedo  | 73    | 0     | 60            | 7     | 0.0048   |

**Table S1B Greening in lafl doubles (compared to Col), Fisher's Exact Test**

|               | WT Col |       | <i>fus3-3 lec1-2</i> |       | p-value  |
|---------------|--------|-------|----------------------|-------|----------|
|               | Green  | White | Green                | White |          |
| Early heart   | 0      | 179   | 0                    | 134   | 1        |
| Mid heart     | 34     | 119   | 0                    | 145   | <0.00001 |
| Late heart    | 135    | 69    | 10                   | 90    | <0.00001 |
| Early torpedo | 100    | 0     | 23                   | 75    | <0.00001 |
| Mid torpedo   | 100    | 0     | 122                  | 42    | <0.00001 |
| Late torpedo  | 100    | 0     | 109                  | 7     | 0.016    |

|               | WT Col |       | <i>fus3-3 lec2-1</i> |       | p-value  |
|---------------|--------|-------|----------------------|-------|----------|
|               | Green  | White | Green                | White |          |
| Early heart   | 0      | 179   | 0                    | 102   | 1        |
| Mid heart     | 34     | 119   | 0                    | 118   | <0.00001 |
| Late heart    | 135    | 69    | 8                    | 111   | <0.00001 |
| Early torpedo | 100    | 0     | 26                   | 65    | <0.00001 |
| Mid torpedo   | 100    | 0     | 85                   | 51    | <0.00001 |
| Late torpedo  | 100    | 0     | 93                   | 6     | 0.014    |

|               | WT Col |       | <i>abi3-3 lec2-1</i> |       | p-value  |
|---------------|--------|-------|----------------------|-------|----------|
|               | Green  | White | Green                | White |          |
| Early heart   | 0      | 179   | 0                    | 107   | 1        |
| Mid heart     | 34     | 119   | 0                    | 88    | <0.00001 |
| Late heart    | 135    | 69    | 7                    | 75    | <0.00001 |
| Early torpedo | 100    | 0     | 28                   | 59    | <0.00001 |
| Mid torpedo   | 100    | 0     | 74                   | 30    | <0.00001 |
| Late torpedo  | 100    | 0     | 110                  | 0     | 1        |

|               | WT Col |       | <i>abi3-3 lec1-2</i> |       | p-value  |
|---------------|--------|-------|----------------------|-------|----------|
|               | Green  | White | Green                | White |          |
| Early heart   | 0      | 179   | 0                    | 97    | 1        |
| Mid heart     | 34     | 119   | 0                    | 105   | <0.00001 |
| Late heart    | 135    | 69    | 7                    | 67    | <0.00001 |
| Early torpedo | 100    | 0     | 23                   | 65    | <0.00001 |
| Mid torpedo   | 100    | 0     | 67                   | 37    | <0.00001 |
| Late torpedo  | 100    | 0     | 129                  | 11    | 0.0031   |

|               | WT Col |       | <i>lec1-2 lec2-1</i> |       | p-value  |
|---------------|--------|-------|----------------------|-------|----------|
|               | Green  | White | Green                | White |          |
| Early heart   | 0      | 179   | 0                    | 48    | 1        |
| Mid heart     | 34     | 119   | 0                    | 70    | <0.00001 |
| Late heart    | 135    | 69    | 13                   | 67    | <0.00001 |
| Early torpedo | 100    | 0     | 31                   | 51    | <0.00001 |
| Mid torpedo   | 100    | 0     | 68                   | 26    | <0.00001 |
| Late torpedo  | 100    | 0     | 88                   | 10    | 0.0007   |

Table S1C

## Greening in lafl doubles (compared to singles), Fisher's Exact Test

|               | <i>fus3-3</i> |       | <i>fus3-3 lec1-2</i> |       | p-value |
|---------------|---------------|-------|----------------------|-------|---------|
|               | Green         | White | Green                | White |         |
| Early heart   | 0             | 59    | 0                    | 134   | 1       |
| Mid heart     | 0             | 55    | 0                    | 145   | 1       |
| Late heart    | 0             | 72    | 10                   | 90    | 0.0055  |
| Early torpedo | 8             | 62    | 23                   | 75    | 0.068   |
| Mid torpedo   | 38            | 27    | 122                  | 42    | 0.025   |
| Late torpedo  | 53            | 0     | 109                  | 7     | 0.1     |

  

|               | <i>lec1-2</i> |       | <i>fus3-3 lec1-2</i> |       | p-value |
|---------------|---------------|-------|----------------------|-------|---------|
|               | Green         | White | Green                | White |         |
| Early heart   | 0             | 82    | 0                    | 134   | 1       |
| Mid heart     | 0             | 66    | 0                    | 145   | 1       |
| Late heart    | 0             | 88    | 10                   | 90    | 0.002   |
| Early torpedo | 15            | 56    | 23                   | 75    | 0.85    |
| Mid torpedo   | 56            | 37    | 122                  | 42    | 0.024   |
| Late torpedo  | 60            | 7     | 109                  | 7     | 0.39    |

  

|               | <i>fus3-3</i> |       | <i>fus3-3 lec2-1</i> |       | p-value |
|---------------|---------------|-------|----------------------|-------|---------|
|               | Green         | White | Green                | White |         |
| Early heart   | 0             | 59    | 0                    | 102   | 1       |
| Mid heart     | 0             | 55    | 0                    | 118   | 1       |
| Late heart    | 0             | 72    | 8                    | 111   | 0.026   |
| Early torpedo | 8             | 62    | 26                   | 65    | 0.011   |
| Mid torpedo   | 38            | 27    | 85                   | 51    | 0.64    |
| Late torpedo  | 53            | 0     | 93                   | 6     | 0.09    |

  

|               | <i>lec2-1</i> |       | <i>fus3-3 lec2-1</i> |       | p-value  |
|---------------|---------------|-------|----------------------|-------|----------|
|               | Green         | White | Green                | White |          |
| Early heart   | 0             | 57    | 0                    | 102   | 1        |
| Mid heart     | 10            | 71    | 0                    | 118   | <0.00001 |
| Late heart    | 34            | 47    | 8                    | 111   | <0.00001 |
| Early torpedo | 48            | 15    | 26                   | 65    | <0.00001 |
| Mid torpedo   | 50            | 0     | 85                   | 51    | <0.00001 |
| Late torpedo  | 50            | 0     | 93                   | 6     | 0.18     |

  

|               | <i>abi3-3</i> |       | <i>abi3-3 lec2-1</i> |       | p-value |
|---------------|---------------|-------|----------------------|-------|---------|
|               | Green         | White | Green                | White |         |
| Early heart   | 0             | 67    | 0                    | 107   | 1       |
| Mid heart     | 0             | 71    | 0                    | 88    | 1       |
| Late heart    | 9             | 72    | 7                    | 75    | 0.61    |
| Early torpedo | 30            | 25    | 28                   | 59    | 0.0093  |
| Mid torpedo   | 62            | 7     | 74                   | 30    | 0.004   |
| Late torpedo  | 68            | 0     | 110                  | 0     | 1       |

|               | <i>lec2-1</i> |       | <i>abi3-3 lec2-1</i> |       | p-value  |
|---------------|---------------|-------|----------------------|-------|----------|
|               | Green         | White | Green                | White |          |
| Early heart   | 0             | 57    | 0                    | 107   | 1        |
| Mid heart     | 10            | 71    | 0                    | 88    | 0.0005   |
| Late heart    | 34            | 47    | 7                    | 75    | <0.00001 |
| Early torpedo | 48            | 15    | 28                   | 59    | <0.00001 |
| Mid torpedo   | 50            | 0     | 74                   | 30    | <0.00001 |
| Late torpedo  | 50            | 0     | 110                  | 0     | 1        |

|               | <i>abi3-3</i> |       | <i>abi3-3 lec1-2</i> |       | p-value  |
|---------------|---------------|-------|----------------------|-------|----------|
|               | Green         | White | Green                | White |          |
| Early heart   | 0             | 67    | 0                    | 97    | 1        |
| Mid heart     | 0             | 71    | 0                    | 105   | 1        |
| Late heart    | 9             | 72    | 7                    | 67    | 0.8      |
| Early torpedo | 30            | 25    | 23                   | 65    | 0.0008   |
| Mid torpedo   | 62            | 7     | 67                   | 37    | <0.00001 |
| Late torpedo  | 68            | 0     | 129                  | 11    | 0.0176   |

|               | <i>lec1-2</i> |       | <i>abi3-3 lec1-2</i> |       | p-value |
|---------------|---------------|-------|----------------------|-------|---------|
|               | Green         | White | Green                | White |         |
| Early heart   | 0             | 82    | 0                    | 97    | 1       |
| Mid heart     | 0             | 66    | 0                    | 105   | 1       |
| Late heart    | 0             | 88    | 7                    | 67    | 0.0035  |
| Early torpedo | 15            | 56    | 23                   | 65    | 0.575   |
| Mid torpedo   | 56            | 37    | 67                   | 37    | 0.56    |
| Late torpedo  | 60            | 7     | 129                  | 11    | 0.6     |

|               | <i>lec1-2</i> |       | <i>lec1-2 lec2-1</i> |       | p-value |
|---------------|---------------|-------|----------------------|-------|---------|
|               | Green         | White | Green                | White |         |
| Early heart   | 0             | 82    | 0                    | 48    | 1       |
| Mid heart     | 0             | 66    | 0                    | 70    | 1       |
| Late heart    | 0             | 88    | 13                   | 67    | 0       |
| Early torpedo | 15            | 56    | 31                   | 51    | 0.0335  |
| Mid torpedo   | 56            | 37    | 68                   | 26    | 0.09    |
| Late torpedo  | 60            | 7     | 88                   | 10    | 1       |

|               | <i>lec2-1</i> |       | <i>lec1-2 lec2-1</i> |       | p-value  |
|---------------|---------------|-------|----------------------|-------|----------|
|               | Green         | White | Green                | White |          |
| Early heart   | 0             | 57    | 0                    | 48    | 1        |
| Mid heart     | 10            | 71    | 0                    | 70    | 0.0018   |
| Late heart    | 34            | 47    | 13                   | 67    | 0.0005   |
| Early torpedo | 48            | 15    | 31                   | 51    | <0.00001 |
| Mid torpedo   | 50            | 0     | 68                   | 26    | <0.00001 |
| Late torpedo  | 50            | 0     | 88                   | 10    | 0.0165   |

Table S1D

## Greening in lafl triples (compared to doubles), Fisher's Exact Test

|               | <i>lec1-2 lec2-1</i> |       | <i>lec1-2 lec2-1 fus3-3</i> |       | p-value |
|---------------|----------------------|-------|-----------------------------|-------|---------|
|               | Green                | White | Green                       | White |         |
| Early heart   | 0                    | 48    | 0                           | 23    | 1       |
| Mid heart     | 0                    | 70    | 0                           | 79    | 1       |
| Late heart    | 13                   | 67    | 7                           | 70    | 0.2328  |
| Early torpedo | 31                   | 51    | 14                          | 48    | 0.0691  |
| Mid torpedo   | 68                   | 26    | 48                          | 35    | 0.0569  |
| Late torpedo  | 88                   | 10    | 38                          | 7     | 0.4077  |
|               | <i>lec1-2 fus3-3</i> |       | <i>lec1-2 lec2-1 fus3-3</i> |       | p-value |
|               | Green                | White | Green                       | White |         |
| Early heart   | 0                    | 134   | 0                           | 23    | 1       |
| Mid heart     | 0                    | 145   | 0                           | 79    | 1       |
| Late heart    | 10                   | 90    | 7                           | 70    | 1       |
| Early torpedo | 23                   | 75    | 14                          | 48    | 1       |
| Mid torpedo   | 122                  | 42    | 48                          | 35    | 0.0092  |
| Late torpedo  | 109                  | 7     | 38                          | 7     | 0.066   |
|               | <i>lec2-1 fus3-3</i> |       | <i>lec1-2 lec2-1 fus3-3</i> |       | p-value |
|               | Green                | White | Green                       | White |         |
| Early heart   | 0                    | 102   | 0                           | 23    | 1       |
| Mid heart     | 0                    | 118   | 0                           | 79    | 1       |
| Late heart    | 8                    | 111   | 7                           | 70    | 0.5886  |
| Early torpedo | 26                   | 65    | 14                          | 48    | 0.4572  |
| Mid torpedo   | 85                   | 51    | 48                          | 35    | 0.5686  |
| Late torpedo  | 93                   | 6     | 38                          | 7     | 0.1121  |
|               | <i>lec1-2 lec2-1</i> |       | <i>lec1-2 lec2-1 abi3-3</i> |       | p-value |
|               | Green                | White | Green                       | White |         |
| Early heart   | 0                    | 48    | 0                           | 77    | 1       |
| Mid heart     | 0                    | 70    | 0                           | 96    | 1       |
| Late heart    | 13                   | 67    | 4                           | 72    | 0.0384  |
| Early torpedo | 31                   | 51    | 12                          | 57    | 0.0066  |
| Mid torpedo   | 68                   | 26    | 33                          | 35    | 0.003   |
| Late torpedo  | 88                   | 10    | 114                         | 15    | 0.1121  |
|               | <i>lec1-2 abi3-3</i> |       | <i>lec1-2 lec2-1 abi3-3</i> |       | p-value |
|               | Green                | White | Green                       | White |         |
| Early heart   | 0                    | 97    | 0                           | 77    | 1       |
| Mid heart     | 0                    | 105   | 0                           | 96    | 1       |
| Late heart    | 7                    | 67    | 4                           | 72    | 0.3645  |
| Early torpedo | 23                   | 65    | 12                          | 57    | 0.2469  |
| Mid torpedo   | 67                   | 37    | 33                          | 35    | 0.0417  |
| Late torpedo  | 129                  | 11    | 114                         | 15    | 0.3103  |
|               | <i>lec2-1 abi3-3</i> |       | <i>lec1-2 lec2-1 abi3-3</i> |       | p-value |
|               | Green                | White | Green                       | White |         |
| Early heart   | 0                    | 107   | 0                           | 77    | 1       |
| Mid heart     | 0                    | 88    | 0                           | 96    | 1       |
| Late heart    | 7                    | 75    | 4                           | 72    | 0.5374  |
| Early torpedo | 28                   | 59    | 12                          | 57    | 0.0428  |
| Mid torpedo   | 74                   | 30    | 33                          | 35    | 0.0037  |
| Late torpedo  | 110                  | 0     | 114                         | 15    | 0.0001  |

**Table S2A****Greening in delayed mutants by stage, Fisher's Exact Test**

|                   | WT    |       | <i>til1-4</i> |       | p-value |
|-------------------|-------|-------|---------------|-------|---------|
|                   | Green | White | Green         | White |         |
| Early heart       | 0     | 24    | 0             | 17    | 1       |
| Mid heart         | 3     | 47    | 2             | 23    | 1       |
| Late heart        | 40    | 57    | 13            | 8     | 0.1     |
| Early/mid torpedo | 112   | 0     | 15            | 0     | 1       |

|                   | WT    |       | <i>fus12</i> |       | p-value |
|-------------------|-------|-------|--------------|-------|---------|
|                   | Green | White | Green        | White |         |
| Early heart       | 4     | 36    | 3            | 20    | 0.7     |
| Mid heart         | 15    | 25    | 4            | 4     | 0.7     |
| Late heart        | 81    | 7     | 6            | 0     | 1       |
| Early/mid torpedo | 50    | 0     | nd           | nd    |         |

**Greening in delayed mutants by day, Fisher's Exact Test**

|       | WT    |       | <i>til1-4</i> |       | p-value  |
|-------|-------|-------|---------------|-------|----------|
|       | Green | White | Green         | White |          |
| 5 DAP | 24    | 114   | 0             | 36    | 0.005    |
| 6 DAP | 135   | 9     | 2             | 41    | <0.00001 |
| 7 DAP | 147   | 0     | 29            | 13    | <0.00001 |

|       | WT    |       | <i>fus12</i> |       | p-value  |
|-------|-------|-------|--------------|-------|----------|
|       | Green | White | Green        | White |          |
| 5 DAP | 3     | 102   | 0            | 36    | 0.57     |
| 6 DAP | 73    | 23    | 3            | 20    | <0.00001 |
| 7 DAP | 76    | 0     | 25           | 8     | 0        |

**Table S2B *FUS3p:GUS* in delayed mutants by stage, Fisher's Exact Test**

|               | WT   |      | <i>til1-4</i> |      | p-value |
|---------------|------|------|---------------|------|---------|
|               | GUS+ | GUS- | GUS+          | GUS- |         |
| Mid globular  | 5    | 23   | 0             | 2    | 1       |
| Late globular | 34   | 17   | 17            | 12   | 0.48    |
| Early heart   | 38   | 6    | 104           | 11   | 0.566   |
| Mid heart     | 21   | 0    | 92            | 0    | 1       |

|               | WT   |      | <i>fus12</i> |      | p-value |
|---------------|------|------|--------------|------|---------|
|               | GUS+ | GUS- | GUS+         | GUS- |         |
| Mid globular  | 2    | 16   | 0            | 5    | 1       |
| Late globular | 61   | 25   | 4            | 1    | 1       |
| Early heart   | 179  | 28   | 14           | 6    | 0.09    |
| Mid heart     | 107  | 0    | 12           | 0    | 1       |

***FUS3p:GUS* in delayed mutants by day, Fisher's Exact Test**

|       | WT   |      | <i>til1-4</i> |      | p-value  |
|-------|------|------|---------------|------|----------|
|       | GUS+ | GUS- | GUS+          | GUS- |          |
| 4 DAP | 111  | 17   | 5             | 35   | <0.00001 |
| 5 DAP | 224  | 11   | 34            | 17   | <0.00001 |
| 6 DAP | 124  | 0    | 38            | 0    | 1        |

  

|       | WT   |      | <i>fus12</i> |      | p-value  |
|-------|------|------|--------------|------|----------|
|       | GUS+ | GUS- | GUS+         | GUS- |          |
| 4 DAP | 148  | 59   | 0            | 12   | <0.00001 |
| 5 DAP | 208  | 7    | 17           | 10   | <0.00001 |
| 6 DAP | 248  | 0    | 31           | 6    | <0.00001 |

Table S2C

***At2S3p:GFP* in delayed mutants by stage, Fisher's Exact Test**

|                   | WT   |      | <i>til1-4</i> |      | p-value |
|-------------------|------|------|---------------|------|---------|
|                   | GFP+ | GFP- | GFP+          | GFP- |         |
| Early heart       | 0    | 16   | 0             | 23   | 1       |
| Mid heart         | 4    | 29   | 2             | 3    | 0.169   |
| Late heart        | 25   | 10   | 20            | 1    | 0.0389  |
| Early/mid torpedo | 40   | 0    | 18            | 0    | 1       |

  

|                   | WT   |      | <i>fus12</i> |      | p-value  |
|-------------------|------|------|--------------|------|----------|
|                   | GFP+ | GFP- | GFP+         | GFP- |          |
| Early heart       | 0    | 39   | 0            | 9    | 1        |
| Mid heart         | 4    | 63   | 6            | 8    | 0.0013   |
| Late heart        | 14   | 24   | 34           | 2    | <0.00001 |
| Early/mid torpedo | 35   | 0    | 14           | 0    | 1        |

***At2S3p:GFP* in delayed mutants by day, Fisher's Exact Test**

|       | WT   |      | <i>til1-4</i> |      | p-value  |
|-------|------|------|---------------|------|----------|
|       | GFP+ | GFP- | GFP+          | GFP- |          |
| 4 DAP | 0    | 50   | 0             | 12   | 1        |
| 5 DAP | 5    | 45   | 0             | 30   | 0.1511   |
| 6 DAP | 70   | 11   | 0             | 48   | <0.00001 |
| 7 DAP | 67   | 0    | 20            | 6    | 0.0003   |

  

|       | WT   |      | <i>fus12</i> |      | p-value  |
|-------|------|------|--------------|------|----------|
|       | GFP+ | GFP- | GFP+         | GFP- |          |
| 4 DAP | 2    | 68   | 0            | 11   | 1        |
| 5 DAP | 26   | 49   | 0            | 23   | 0.0003   |
| 6 DAP | 121  | 2    | 6            | 20   | <0.00001 |
| 7 DAP | 151  | 0    | 49           | 0    | 1        |



**Table S2D Cellularization in delayed mutants by stage**

|               | WT           |                  | <i>til1-4</i> |                  | p-value  |
|---------------|--------------|------------------|---------------|------------------|----------|
|               | Cellularized | Not cellularized | Cellularized  | Not cellularized |          |
| Late globular | 0            | 48               | 12            | 18               | <0.00001 |
| Early heart   | 2            | 86               | 26            | 30               | <0.00001 |
| Mid heart     | 33           | 52               | 39            | 0                | <0.00001 |
| Late heart    | 119          | 1                | 36            | 0                | 1        |

|               | WT           |                  | <i>fus12</i> |                  | p-value |
|---------------|--------------|------------------|--------------|------------------|---------|
|               | Cellularized | Not cellularized | Cellularized | Not cellularized |         |
| Late globular | 0            | 34               | 0            | 10               | 1       |
| Early heart   | 20           | 63               | 6            | 36               | 0.248   |
| Mid heart     | 28           | 12               | 13           | 8                | 0.574   |
| Late heart    | 27           | 1                | 9            | 1                | 0.462   |

**Table S3A Greening in endosperm mutants, Fisher's Exact Test**

|               | WT    |       | <i>mini3-2</i> |       | p-value |
|---------------|-------|-------|----------------|-------|---------|
|               | Green | White | Green          | White |         |
| Early heart   | 0     | 179   | 1              | 143   | 0.45    |
| Mid heart     | 34    | 119   | 36             | 90    | 0.27    |
| Late heart    | 135   | 69    | 197            | 107   | 0.78    |
| Early torpedo | 100   | 0     | 62             | 0     | 1       |

  

|               | WT    |       | <i>shb1</i> |       | p-value |
|---------------|-------|-------|-------------|-------|---------|
|               | Green | White | Green       | White |         |
| Early heart   | 0     | 179   | 0           | 110   | 1       |
| Mid heart     | 34    | 119   | 23          | 49    | 0.14    |
| Late heart    | 135   | 69    | 126         | 53    | 0.38    |
| Early torpedo | 100   | 0     | 87          | 0     | 1       |

  

|               | WT    |       | <i>shb1-D</i> |       | p-value |
|---------------|-------|-------|---------------|-------|---------|
|               | Green | White | Green         | White |         |
| Early heart   | 0     | 93    | 0             | 87    | 1       |
| Mid heart     | 11    | 83    | 22            | 117   | 0.45    |
| Late heart    | 62    | 50    | 144           | 83    | 0.16    |
| Early torpedo | 61    | 15    | 61            | 0     | 0.0001  |

**Table S3B FUS3p:GUS in endosperm mutants, Fisher's Exact Test**

|               | WT   |      | <i>mini3-2</i> |      | p-value |
|---------------|------|------|----------------|------|---------|
|               | GUS+ | GUS- | GUS+           | GUS- |         |
| Mid globular  | 0    | 23   | 0              | 22   | 1       |
| Late globular | 5    | 38   | 6              | 22   | 0.32    |
| Early heart   | 100  | 68   | 60             | 35   | 0.6     |
| Mid heart     | 101  | 8    | 82             | 5    | 0.78    |

|               | WT   |      | <i>shb1</i> |      | p-value |
|---------------|------|------|-------------|------|---------|
|               | GUS+ | GUS- | GUS+        | GUS- |         |
| Mid globular  | 0    | 43   | 0           | 43   | 1       |
| Late globular | 6    | 58   | 10          | 62   | 0.44    |
| Early heart   | 144  | 52   | 137         | 67   | 0.19    |
| Mid heart     | 71   | 0    | 74          | 0    | 1       |

|               | WT   |      | <i>shb1-D</i> |      | p-value |
|---------------|------|------|---------------|------|---------|
|               | GUS+ | GUS- | GUS+          | GUS- |         |
| Mid globular  | 2    | 31   | 0             | 32   | 0.49    |
| Late globular | 20   | 22   | 12            | 22   | 0.35    |
| Early heart   | 54   | 24   | 72            | 26   | 0.61    |
| Mid heart     | 75   | 0    | 48            | 0    | 1       |

Table S3C

## At2S3p:GFP in endosperm mutants, Fisher's Exact Test

|                   | WT   |      | <i>mini3-2</i> |      | p-value |
|-------------------|------|------|----------------|------|---------|
|                   | GFP+ | GFP- | GFP+           | GFP- |         |
| Early heart       | 14   | 44   | 12             | 60   | 0.38    |
| Mid heart         | 20   | 25   | 18             | 32   | 0.41    |
| Late heart        | 50   | 1    | 36             | 2    | 0.57    |
| Early/mid torpedo | 54   | 0    | 69             | 1    | 1       |

|                   | WT   |      | <i>shb1</i> |      | p-value |
|-------------------|------|------|-------------|------|---------|
|                   | GFP+ | GFP- | GFP+        | GFP- |         |
| Early heart       | 1    | 39   | 17          | 65   | 0.0063  |
| Mid heart         | 17   | 29   | 24          | 36   | 0.84    |
| Late heart        | 33   | 7    | 50          | 2    | 0.037   |
| Early/mid torpedo | 50   | 0    | 48          | 0    | 1       |

|                   | WT   |      | <i>shb1-D</i> |      | p-value |
|-------------------|------|------|---------------|------|---------|
|                   | GFP+ | GFP- | GFP+          | GFP- |         |
| Early heart       | 1    | 40   | 4             | 46   | 0.37    |
| Mid heart         | 14   | 24   | 16            | 34   | 0.66    |
| Late heart        | 59   | 11   | 42            | 17   | 0.088   |
| Early/mid torpedo | 46   | 1    | 48            | 5    | 0.21    |

**Table S3D****Sample sizes for mutants that fail to cellularize****Greening**

|                                 |       | <i>fis2-6</i> | <i>fie-12</i> | <i>ede1-1</i> |
|---------------------------------|-------|---------------|---------------|---------------|
| WT early torp to early bent cot | white | 56            | 83            | 28            |
|                                 | green | 66            | 60            | 51            |
| WT bent cot to almost full      | white | 16            | 18            | 25            |
|                                 | green | 26            | 47            | 26            |

***FUS3p:GUS***

|                                 |            | <i>fis2-6</i> | <i>fie-12</i> | <i>ede1-1</i> |
|---------------------------------|------------|---------------|---------------|---------------|
| WT early torp to early bent cot | Full GUS   | 49            | 101           | 89            |
|                                 | Patchy GUS | 23            | 0             | 0             |
|                                 | No GUS     | 25            | 17            | 16            |
| WT bent cot to almost full      | Full GUS   | 29            | 106           | 45            |
|                                 | Patchy GUS | 24            | 0             | 0             |
|                                 | No GUS     | 8             | 13            | 9             |

***At2S3p:GFP***

|                                 |      | <i>fis2-6</i> | <i>fie-12</i> | <i>ede1-1</i> |
|---------------------------------|------|---------------|---------------|---------------|
| WT early torp to early bent cot | GFP+ | 44            | 15            | 42            |
|                                 | GFP- | 9             | 44            | 3             |
| WT bent cot to almost full      | GFP+ | 46            | 27            | 42            |
|                                 | GFP- | 8             | 44            | 4             |

**Table S4**      **sweet11;12;15; Fisher's Exact Tests**

**Greening**

|               | WT Col |       | <i>sweet11;12;15</i> |       | p-value  |
|---------------|--------|-------|----------------------|-------|----------|
|               | Green  | White | Green                | White |          |
| Early heart   | 0      | 179   | 0                    | 104   | 1        |
| Mid heart     | 34     | 119   | 25                   | 195   | 0.006    |
| Late heart    | 135    | 69    | 89                   | 93    | 0.0007   |
| Early torpedo | 100    | 0     | 66                   | 27    | <0.00001 |
| Mid torpedo   | 100    | 0     | 86                   | 2     | 0.22     |

***FUS3p:GUS***

|               | WT   |      | <i>sweet11;12;15</i> |      | p-value |
|---------------|------|------|----------------------|------|---------|
|               | GUS+ | GUS- | GUS+                 | GUS- |         |
| Mid globular  | 2    | 64   | 4                    | 26   | 0.074   |
| Late globular | 27   | 44   | 25                   | 24   | 0.191   |
| Early heart   | 81   | 35   | 69                   | 14   | 0.0446  |
| Mid heart     | 54   | 0    | 34                   | 0    | 1       |

***At2S3p:GFP***

|               | WT   |      | <i>sweet11;12;15</i> |      | p-value  |
|---------------|------|------|----------------------|------|----------|
|               | GFP+ | GFP- | GFP+                 | GFP- |          |
| Early heart   | 6    | 58   | 0                    | 35   | 0.09     |
| Mid heart     | 29   | 36   | 0                    | 44   | <0.00001 |
| Late heart    | 49   | 13   | 20                   | 46   | <0.00001 |
| Early torpedo | 56   | 0    | 47                   | 16   | 0        |
| Mid torpedo   | 50   | 0    | 41                   | 0    | 1        |

**Cellularization**

|               | WT    |         | <i>sweet11;12;15</i> |         | p-value |
|---------------|-------|---------|----------------------|---------|---------|
|               | Cell. | Uncell. | Cell.                | Uncell. |         |
| Late globular | 0     | 90      | 1                    | 51      | 0.366   |
| Early heart   | 8     | 116     | 13                   | 49      | 0.0057  |
| Mid heart     | 45    | 43      | 29                   | 69      | 0.0042  |
| Late heart    | 78    | 7       | 35                   | 3       | 1       |
